# Supplementary material
Source: Springer Nature journal article supplement (https://www.springermedizin.de/resource/supplementary/12885_2011_3571_MOESM1_ESM.pdf/9463952)

**(a)**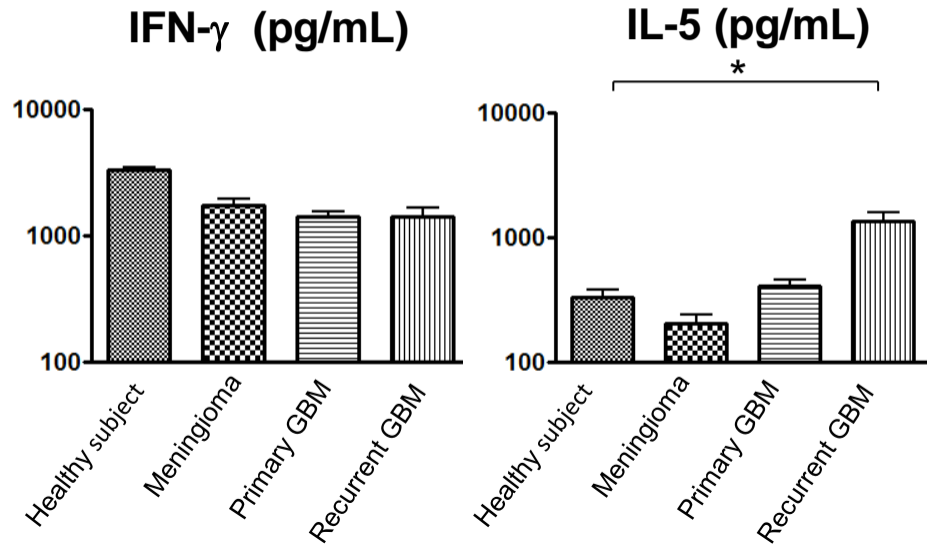**(b)**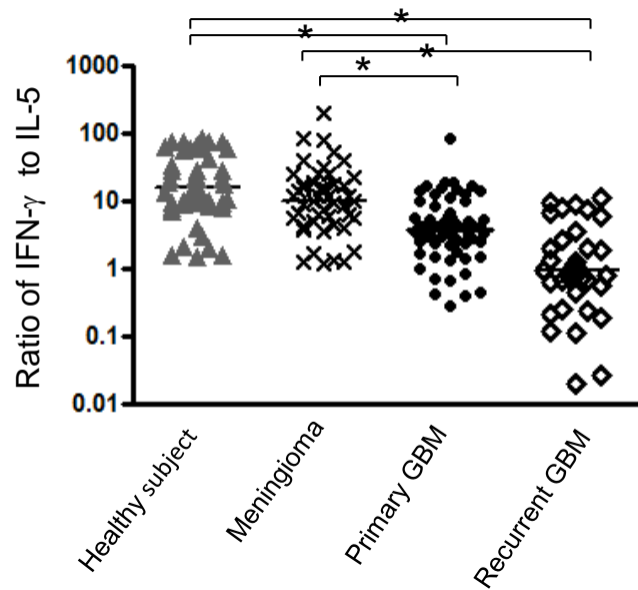

Supplement: MOESM1 [file 9463952]
